# Supplementary material for: Incidence of Canine Dilated Cardiomyopathy Diagnosed at Referral Institutes and Grain-Free Pet Food Store Sales: A Retrospective Survey
Source: Frontiers journal article supplement (doi:10.3389/fanim.2022.846227), 2022-03-17
Supplement: Table_1.DOCX [file Table_1.DOCX]

|  |  | **Ethos HI** | **Ethos MA** | **Ethos CO** | **Ethos NH** | **VSH NC** | **KS State** | **Ethos IL** | **SW FL Vet Specialists** | **Ethos WI** | **The Heart Vet NY** | **Garden State NJ** | **Red Bank NJ** | **Univ. of MO** | **WA State** | **Average per year1** |
| --- | --- | --- | --- | --- | --- | --- | --- | --- | --- | --- | --- | --- | --- | --- | --- | --- |
| **2019** | **DCM** | 26 | 26 | 54 | 74 | 20 | 19 | 32 | 22 | 24 | 15 | 2 | 50 | 34 | 53 | 4.69% |
| **All K9 referrals** | 660 | 1248 | 1325 | 510 | 992 | 907 | 435 | 779 | 260 | 375 | 476 | 1267 | 993 | 905 |
| **Incidence %** | 3.94% | 2.08% | 4.08% | 14.51% | 2.02% | 1.98% | 7.36% | 2.82% | 9.23% | 4.00% | 0.42% | 3.95% | 3.42% | 5.86% |
| **2018** | **DCM** |  | 16 | 33 | 46 | 21 | 15 |  | 18 | 14 | 26 | 0 | 40 | 41 | 42 | 3.74% |
| **All K9 referrals** |  | 1298 | 802 | 483 | 939 | 750 |  | 292 | 259 | 604 | 487 | 1069 | 838 | 752 |
| **Incidence %** |  | 1.23% | 4.11% | 9.52% | 2.24% | 2.00% |  | 1.94% | 5.41% | 4.30% | 0.00% | 3.74% | 4.89% | 5.59% |
| **2017** | **DCM** |  |  | 7 | 6 | 17 | 22 | 20 | 32 | 23 | 15 | 5 | 31 | 21 | 22 | 4.29% |
| **All K9 referrals** |  |  | 336 | 55 | 671 | 700 | 354 | 977 | 322 | 236 | 686 | 831 | 732 | 669 |
| **Incidence %** |  |  | 2.08% | 10.91% | 2.53% | 3.14% | 5.65% | 3.28% | 7.14% | 6.36% | 0.73% | 3.73% | 2.87% | 3.15% |
| **2016** | **DCM** |  |  |  |  | 4 | 13 | 1 | 27 | 22 | 36 | 13 | 35 | 15 | 23 | 4.15% |
| **All K9 referrals** |  |  |  |  | 54 | 560 | 134 | 813 | 319 | 396 | 1131 | 873 | 613 | 557 |
| **Incidence %** |  |  |  |  | 7.41% | 2.32% | 0.75% | 3.32% | 6.90% | 9.09% | 1.15% | 4.01% | 2.45% | 4.13% |
| **2015** | **DCM** |  |  |  |  |  |  | 2 | 21 | 31 | 39 | 10 | 35 | 12 | 19 | 4.37% |
| **All K9 referrals** |  |  |  |  |  |  | 68 | 207 | 302 | 500 | 1127 | 731 | 541 | 556 |
| **Incidence %** |  |  |  |  |  |  | 2.94% | 2.96% | 10.26% | 7.80% | 0.89% | 4.79% | 2.22% | 3.42% |
| **2014** | **DCM** |  |  |  |  |  |  |  | 22 | 28 | 35 | 11 | 33 | 19 | 15 | 4.62% |
| **All K9 referrals** |  |  |  |  |  |  |  | 618 | 294 | 520 | 1134 | 708 | 441 | 580 |
| **Incidence %** |  |  |  |  |  |  |  | 3.56% | 9.52% | 6.73% | 0.97% | 4.66% | 4.31% | 2.59% |
| **2013** | **DCM** |  |  |  |  |  |  |  | 24 | 27 | 8 | 15 | 42 | 18 | 14 | 4.59% |
| **All K9 referrals** |  |  |  |  |  |  |  | 612 | 312 | 122 | 1126 | 763 | 450 | 640 |
| **Incidence %** |  |  |  |  |  |  |  | 3.92% | 8.65% | 6.56% | 1.33% | 5.50% | 4.00% | 2.19% |
| **2012** | **DCM** |  |  |  |  |  |  |  | 15 | 20 | 37 | 7 | 46 | 6 | 9 | 4.03% |
| **All K9 referrals** |  |  |  |  |  |  |  | 525 | 256 | 416 | 1044 | 789 | 418 | 670 |
| **Incidence %** |  |  |  |  |  |  |  | 2.86% | 7.18% | 8.89% | 0.67% | 5.83% | 1.44% | 1.34% |
| **2011** | **DCM** |  |  |  |  |  |  |  | 24 | 22 | 32 | 17 | 23 | 6 | 9 | 4.13% |
| **All K9 referrals** |  |  |  |  |  |  |  | 469 | 267 | 416 | 910 | 740 | 369 | 715 |
| **Incidence %** |  |  |  |  |  |  |  | 5.12% | 8.24% | 7.69% | 1.87% | 3.11% | 1.63% | 1.26% |
| **2010** | **DCM** |  |  |  |  |  |  |  |  | 25 | 23 | 12 | 38 | 2 | 19 | 4.22% |
| **All K9 referrals** |  |  |  |  |  |  |  |  | 235 | 453 | 1021 | 804 | 366 | 596 |
| **Incidence %** |  |  |  |  |  |  |  |  | 10.64% | 5.08% | 1.18% | 4.73% | 0.55% | 3.19% |
| **2009** | **DCM** |  |  |  |  |  |  |  |  |  | 17 | 9 | 38 | 5 | 10 | 3.49% |
| **All K9 referrals** |  |  |  |  |  |  |  |  |  | 185 | 844 | 888 | 433 | 560 |
| **Incidence %** |  |  |  |  |  |  |  |  |  | 9.19% | 1.07% | 4.28% | 1.15% | 1.79% |
| **2008** | **DCM** |  |  |  |  |  |  |  |  |  |  | 2 | 37 | 11 | 14 | 2.61% |
| **All K9 referrals** |  |  |  |  |  |  |  |  |  |  | 208 | 963 | 434 | 450 |
| **Incidence %** |  |  |  |  |  |  |  |  |  |  | 0.96% | 3.84% | 2.53% | 3.11% |
| **2007** | **DCM** |  |  |  |  |  |  |  |  |  |  |  | 41 | 10 | 10 | 2.88% |
| **All K9 referrals** |  |  |  |  |  |  |  |  |  |  |  | 991 | 448 | 440 |
| **Incidence %** |  |  |  |  |  |  |  |  |  |  |  | 4.14% | 2.23% | 2.27% |
| **2006** | **DCM** |  |  |  |  |  |  |  |  |  |  |  | 22 | 16 | 14 | 3.94% |
| **All K9 referrals** |  |  |  |  |  |  |  |  |  |  |  | 595 | 473 | 410 |
| **Incidence %** |  |  |  |  |  |  |  |  |  |  |  | 3.70% | 3.38% | 3.41% |
| **2005** | **DCM** |  |  |  |  |  |  |  |  |  |  |  | 12 | 5 | 16 | 2.70% |
| **All K9 referrals** |  |  |  |  |  |  |  |  |  |  |  | 306 | 356 | 576 |
| **Incidence %** |  |  |  |  |  |  |  |  |  |  |  | 3.92% | 1.40% | 2.78% |
| **2004** | **DCM** |  |  |  |  |  |  |  |  |  |  |  |  | 2 | 13 | 3.95% |
| **All K9 referrals** |  |  |  |  |  |  |  |  |  |  |  |  | 34 | 640 |
| **Incidence %** |  |  |  |  |  |  |  |  |  |  |  |  | 5.88% | 2.03% |
| **2003** | **DCM** |  |  |  |  |  |  |  |  |  |  |  |  |  | 12 | 2.53% |
| **All K9 referrals** |  |  |  |  |  |  |  |  |  |  |  |  |  | 475 |
| **Incidence %** |  |  |  |  |  |  |  |  |  |  |  |  |  | 2.53% |
| **2002** | **DCM** |  |  |  |  |  |  |  |  |  |  |  |  |  | 14 | 3.22% |
| **All K9 referrals** |  |  |  |  |  |  |  |  |  |  |  |  |  | 435 |
| **Incidence %** |  |  |  |  |  |  |  |  |  |  |  |  |  | 3.22% |
| **2001** | **DCM** |  |  |  |  |  |  |  |  |  |  |  |  |  | 14 | 5.65% |
| **All K9 referrals** |  |  |  |  |  |  |  |  |  |  |  |  |  | 248 |
| **Incidence %** |  |  |  |  |  |  |  |  |  |  |  |  |  | 5.65% |
| **2000** | **DCM** |  |  |  |  |  |  |  |  |  |  |  |  |  | 8 | 4.42% |
| **All K9 referrals** |  |  |  |  |  |  |  |  |  |  |  |  |  | 181 |
| **Incidence %** |  |  |  |  |  |  |  |  |  |  |  |  |  | 4.42% |
|  |  |  |  |  |  |  |  |  |  |  |  |  |  |  |  |  |
| **Average for each clinic** | | 3.94% | 1.65% | 3.81% | 12.02% | 2.33% | 2.33% | 5.55% | 3.19% | 8.35% | 6.70% | 1.01% | 4.25% | 2.81% | 3.16% |  |

**Supplementary Table 1**. The annual incidence rate of dilated cardiomyopathy, initial diagnosis, as reported by surveyed cardiology referral clinics. Fourteen cardiology referral clinics reported the initial dilated cardiomyopathy cases for each year the data was available.

Total canine referral patients and the number of dilated cardiomyopathy (DCM) cases are noted. The incidence rate was based on these two numbers per clinic, per year.

1Average Percentages of dilated cardiomyopathy incidence rate across all 14 cardiology services regardless of years of data. The annual average of DCM was 3.90% with a range of 2.53-5.65%.
